## Volume 3 Spring Issue

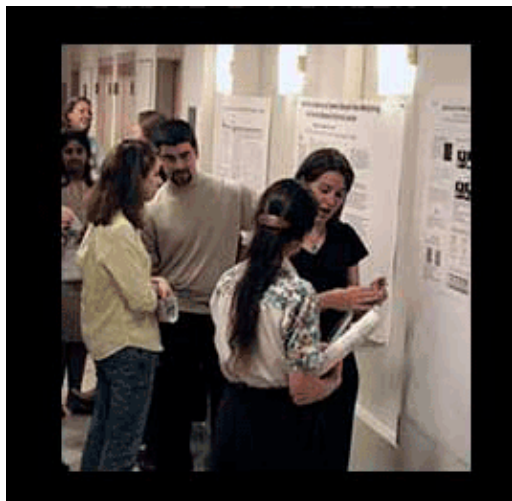

### Table of Contents

Use Arrows to Browse  
Previous Issues

### Contact CBE

8120 Woodmont Avenue Suite  
750  
Bethesda, Maryland 20814-  
2762  
Phone: (301) 347-9300  
Fax: (301) 347-9350  
[cbe@ascb.org](mailto:cbe@ascb.org)

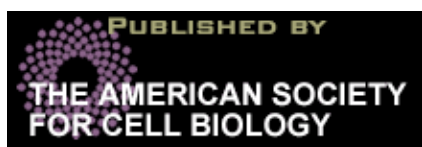

[Editorial Board Member Login](#)

## FEATURES

- **Approaches to Biology Teaching and Learning: Lesson Study—Building Communities of Learning Among Educators**  
by Deborah Allen, Richard Donham and Kimberly Tanner
- **WWW.Cell Biology Education**  
by Robert Blystone
- **Review of: PLoS Biology**  
**A Freely Available, Open Access Online Journal**  
by Todd Eckdahl
- **Review of: *Introduction to Biotechnology*** by William J. Thieman and Michael A. Palladino  
**Biology for the Utilitarian**  
by Tom D. Wolkow
- **Reviews of:**  
***Stem Cells and Cloning*** by David A. Prentice, Benjamin Cummings  
***Cells and the Future of Regenerative Medicine*** by National Research Council, Institute of Medicine  
***Stem Cells: Scientific Progress and Future Research Directions*** by Department of Health and Human Services  
***Human Embryonic Stem Cells*** by Ann A. Kiessling, and Scott Anderson  
**A Shelf of Stem Cells**  
by Rachel Fink
- **Points of View:**

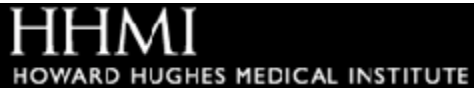

Supported in part by an Undergraduate Science Education Program grant from the Howard Hughes Medical Institute

## Should Students Be Encouraged To Publish Their Research in Student-Run Publications?

by Scott F. Gilbert, John R. Jungck, Margaret Harris, Renee Mercuri, Joshua Tusin, and Vivian Siegel

### ESSAY

---

- **Meeting the Challenge of Science Literacy: Project 2061 Efforts To Improve Science Education**

by Mary Koppal and Ann Caldwell

### ARTICLES

---

- **Characterization of Pathogenic Human MSH2 Missense Mutations Using Yeast as a Model System: A Laboratory Course in Molecular Biology**  
by Alison E. Gammie and Naz Erdeniz
- **Just-in-Time Teaching in Biology: Creating an Active Learner Classroom Using the Internet**  
by Kathleen A. Marrs and Gregor Novak
- **Mystery of the Toxic Flea Dip: An Interactive Approach to Teaching Aerobic Cellular Respiration**  
by A. T. Baines, M. McVey, B. Rybarczyk, J. T. Thompson, and H. R. Wilkins

### FEATURES

---

- **From the National Academies**  
by Jay B. Labov

### ANNOUNCEMENTS

---

September 3–7, 2005, Sydney, Australia  
**15th International Society of  
Developmental Biologists Congress**

**Submit Your Manuscript**  
Online Manuscript Submission

- **Instructions to Authors**
- **Top Ten Reasons to Publish in CBE**  
[pdf]

### **Other Information:**

There are **6,450** registered users signed up to receive quarterly notification of new content.

[Become a registered user.](#)

**Order a Free CBE Poster**

*On the Cover* [\[Printable Cover\]](#)

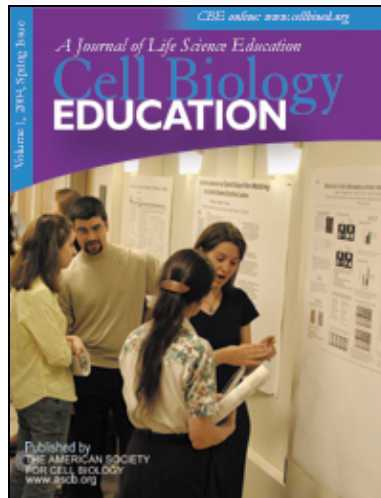

Davidson College undergraduate students and faculty celebrate student research with an annual research symposium in early May. Students who have conducted research in biology, chemistry, mathematics, physics and psychology share their findings via poster presentations. In 2003, 94 students and 18 faculty members presented 85 posters with students, staff and faculty from across the campus in attendance.
